# Supplementary material for: Molecular Signature of Cancer at Gene Level or Pathway Level? Case Studies of Colorectal Cancer and Prostate Cancer Microarray Data
Source: Comput Math Methods Med. 2013 Jan 16;2013:909525. doi: 10.1155/2013/909525 (PMC3562646; doi:10.1155/2013/909525)
Supplement: Supplementary file 1 — Supplementary Table 1: The detailed information of the prostate cancer gene expression data sets used in the meta-analysis. Supplementary Table 2: The detailed list of the 262 GeneGO pathways that are enriched with DEGs (p-value < 0.05) Supplementary Table 3: The detailed list of the 111 GSEA gene sets that are enriched with DEGs (NOM p-value < 0.05 and FDR q-value < 0.05) [file 909525.f1.zip]

Archive with 3 entries (3 files):
- Additional_file_1_CMMM_439518.xls
- Additional_file_2_CMMM_439519.xls
- Additional_file_3_CMMM_439520.xls
