# Supplementary material for: Molecular Signature of Cancer at Gene Level or Pathway Level? Case Studies of Colorectal Cancer and Prostate Cancer Microarray Data
Source: Comput Math Methods Med. 2013 Jan 16;2013:909525. doi: 10.1155/2013/909525 (PMC3562646; doi:10.1155/2013/909525)
Supplement: Supplementary file 1 — Supplementary Table 1: The detailed information of the prostate cancer gene expression data sets used in the meta-analysis. Supplementary Table 2: The detailed list of the 262 GeneGO pathways that are enriched with DEGs (p-value < 0.05) Supplementary Table 3: The detailed list of the 111 GSEA gene sets that are enriched with DEGs (NOM p-value < 0.05 and FDR q-value < 0.05) [file 909525.f1.zip › Additional_file_1_CMMM_439518.xls]

## Sheet: Sheet1
			Prostate cancer gene expression data sets used in the meta-analysis*.
Dataset	Platform	Total genes	Total	Experimental design				Statistical
			samples	NAP	BPH	PCA	MET	Method
Dhanasekaran	cDNA	9984	52	4	14	14	20	t-test
Lapointe3044	cDNA	43008	45	16		29		SAM
Lapointe3289	cDNA	43008	41	16		25		SAM
Luo	cDNA	6500	25	9		16		MDS
Tomlins	cDNA	20000	71	15	4	32	20	COPA
Magee	Human6800	7129	15	0	4	8	3	t-test
Nanni	HGU133A	22283	24	2		22		SAM
Singh	HGU95av2	12625	102	50		52		S2N
Varambally	HGU133P2	54675	19	0	6	7	6	t-test
Welsh	HGU95A	12626	34	9		25		t-test
Abbreviations: NAP, normal prostate samples; BPH, benign prostate samples; PCA, primary prostate cancer samples; MET, metastatic prostate cancer samples; SAM, significance analysis of microarrays; MDS, multidimensional scaling method; COPA: cancer outlier profile analysis; S2N: signal-to-noise statistic.
