# Supplementary material for: Molecular Signature of Cancer at Gene Level or Pathway Level? Case Studies of Colorectal Cancer and Prostate Cancer Microarray Data
Source: Comput Math Methods Med. 2013 Jan 16;2013:909525. doi: 10.1155/2013/909525 (PMC3562646; doi:10.1155/2013/909525)
Supplement: Supplementary file 1 — Supplementary Table 1: The detailed information of the prostate cancer gene expression data sets used in the meta-analysis. Supplementary Table 2: The detailed list of the 262 GeneGO pathways that are enriched with DEGs (p-value < 0.05) Supplementary Table 3: The detailed list of the 111 GSEA gene sets that are enriched with DEGs (NOM p-value < 0.05 and FDR q-value < 0.05) [file 909525.f1.zip › Additional_file_2_CMMM_439519.xls]

## Sheet: GeneGO Result
Pathway Name	Pathway Class	Subclass	PubMed Citation Count*(This may be a little changed since the updating of PubMed)	Supporting data set
(L)-Arginine metabolism	Metabolic maps	Aminoacid metabolism	56	Esther Graudens
2-Naphthylamine and 2-Nitronaphtalene metabolism	Metabolic maps	Xenobiotic metabolism	0	Galamb1
Aldosterone biosynthesis and metabolism	Metabolic maps	Steroid metabolism	5	Galamb2
Aminoacyl-tRNA biosynthesis in cytoplasm	Metabolic maps	Aminoacid metabolism	0	Jacob Sabates-Bellver	Esther Graudens
Aminoacyl-tRNA biosynthesis in cytoplasm/ Rodent version	Metabolic maps	Aminoacid metabolism	0	Jacob Sabates-Bellver	Esther Graudens
Androstenedione and testosterone biosynthesis and metabolism p.1	Metabolic maps	Steroid metabolism	0	Yi Hong
Androstenedione and testosterone biosynthesis and metabolism p.1/ Rodent version	Metabolic maps	Steroid metabolism	0	Yi Hong
Apoptosis and survival_Anti-apoptotic action of membrane-bound ESR1	Protein function	Apoptosis and survival	0	Esther Graudens
Apoptosis and survival_Anti-apoptotic action of nuclear ESR1 and ESR2	Protein function	Apoptosis and survival	0	Jacob Sabates-Bellver	Yi Hong	Galamb2
Apoptosis and survival_Anti-apoptotic TNFs/NF-kB/Bcl-2 pathway	Regulatory processes	Apoptosis and survival	0	Esther Graudens
Apoptosis and survival_BAD phosphorylation	Regulatory processes	Apoptosis and survival	218	Galamb1
Apoptosis and survival_Endoplasmic reticulum stress response pathway	Regulatory processes	Apoptosis and survival	2	Jacob Sabates-Bellver
Apoptosis and survival_FAS signaling cascades	Regulatory processes	Apoptosis and survival	12	Jacob Sabates-Bellver	Galamb2
Apoptosis and survival_Inhibition of ROS-induced apoptosis by 17beta-estradiol	Protein function	Hormones Regulatory processes	0	Jacob Sabates-Bellver
Apoptosis and survival_NGF signaling pathway	Protein function	Neurogenesis	429	Galamb1
Apoptosis and survival_Regulation of Apoptosis by Mitochondrial Proteins	Regulatory processes	Apoptosis and survival	0	Esther Graudens
Apoptosis and survival_Role of IAP-proteins in apoptosis	Regulatory processes	Apoptosis and survival	0	Esther Graudens
ATP/ITP metabolism	Metabolic maps	Nucleotide metabolism	0	Esther Graudens
Blood coagulation_GPIb-IX-V-dependent platelet activation	Diseases	Cell adhesion	0	Jacob Sabates-Bellver	Galamb1
Blood coagulation_GPVI-dependent platelet activation	Diseases	Cell adhesion	3	Jacob Sabates-Bellver
Cardiac Hypertrophy_NF-AT signaling in Cardiac Hypertrophy	Diseases	Cardiovascular Diseases	0	Yi Hong	Galamb1
Cell adhesion_Alpha-4 integrins in cell migration and adhesion	Regulatory processes	Cytoskeleton remodeling	7	Yi Hong	Esther Graudens
Cell adhesion_Cadherin-mediated cell adhesion	Regulatory processes	Cell adhesion	173	Esther Graudens
Cell adhesion_Cell-matrix glycoconjugates	Regulatory processes	Cell adhesion	0	Esther Graudens
Cell adhesion_Chemokines and adhesion	Diseases	Cell adhesion	1117	Jacob Sabates-Bellver	Yi Hong	Galamb1	Esther Graudens
Cell adhesion_ECM remodeling	Regulatory processes	Cell adhesion	64	Jacob Sabates-Bellver	Yi Hong	Galamb2	Esther Graudens
Cell adhesion_Endothelial cell contacts by non-junctional mechanisms	Regulatory processes	Cell adhesion	0	Jacob Sabates-Bellver	Yi Hong
Cell adhesion_Ephrins signaling	Regulatory processes	Cell adhesion	1952	Esther Graudens
Cell adhesion_Gap junctions	Regulatory processes	Transport	97	Yi Hong	Esther Graudens
Cell adhesion_Histamine H1 receptor signaling in the interruption of cell barrier integrity	Protein function	Cell adhesion	0	Yi Hong
Cell adhesion_Integrin inside-out signaling	Regulatory processes	Cell adhesion	0	Yi Hong
Cell adhesion_Integrin-mediated cell adhesion and migration	Regulatory processes	Cell adhesion	0	Yi Hong	Esther Graudens
Cell adhesion_Plasmin signaling	Diseases	Cell adhesion	1952	Jacob Sabates-Bellver	Yi Hong	Esther Graudens
Cell adhesion_PLAU signaling	Diseases	Cell adhesion	1952	Yi Hong	Esther Graudens
Cell adhesion_Role of tetraspanins in the integrin-mediated cell adhesion	Regulatory processes	Cell adhesion	0	Yi Hong	Esther Graudens
Cell cycle_ESR1 regulation of G1/S transition	Diseases	Development	9	Esther Graudens
Cell cycle_Initiation of mitosis	Diseases	Cell cycle	0	Galamb1
Cell cycle_Regulation of G1/S transition (part 1)	Regulatory processes	Cell cycle	1	Esther Graudens
Cell cycle_Role of 14-3-3 proteins in cell cycle regulation	Regulatory processes	Cell cycle	0	Galamb1	Esther Graudens
Cell cycle_Role of Nek in cell cycle regulation	Diseases	Cell cycle	0	Galamb1	Esther Graudens
Cell cycle_Role of SCF complex in cell cycle regulation	Regulatory processes	Cell cycle	0	Esther Graudens
Cell cycle_Spindle assembly and chromosome separation	Regulatory processes	Cell cycle	0	Esther Graudens
Cell cycle_Start of DNA replication in early S phase	Regulatory processes	Cell cycle	0	Jacob Sabates-Bellver
Cell cycle_Transition and termination of DNA replication	Regulatory processes	Cell cycle	0	Galamb1	Esther Graudens
CFTR folding and maturation (norm and CF)	Diseases	Lung Diseases	0	Esther Graudens
CFTR translational fidelity (class I mutations)	Diseases	Lung Diseases	0	Jacob Sabates-Bellver	Yi Hong	Esther Graudens
Chemotaxis_CCR4-induced leukocyte adhesion	Protein function	Immune response	16	Esther Graudens
Chemotaxis_CXCR4 signaling pathway	Diseases	chemokines Protein function	1747	Esther Graudens
Chemotaxis_Inhibitory action of lipoxins on IL-8- and Leukotriene B4-induced neutrophil migration	Regulatory processes	Immune response	0	Esther Graudens
Chemotaxis_Lipoxin inhibitory action on fMLP-induced neutrophil chemotaxis	Protein function	Immune response	0	Esther Graudens
Cholesterol and Sphingolipids transport	Diseases	Lung Diseases	0	Esther Graudens	Jacob Sabates-Bellver	Yi Hong
Cholesterol Biosynthesis	Metabolic maps	Steroid metabolism	91	Jacob Sabates-Bellver
CTP/UTP metabolism	Metabolic maps	Nucleotide metabolism	0	Esther Graudens
Cytoskeleton remodeling_CDC42 in cellular processes	Protein function	Cytoskeleton remodeling	12	Esther Graudens
Cytoskeleton remodeling_Cytoskeleton remodeling	Diseases	Cytoskeleton remodeling	5	Jacob Sabates-Bellver	Yi Hong	Esther Graudens
Cytoskeleton remodeling_ESR1 action on cytoskeleton remodeling and cell migration	Protein function	Cytoskeleton remodeling	0	Yi Hong
Cytoskeleton remodeling_FAK signaling	Protein function	Development	50	Galamb1
Cytoskeleton remodeling_Fibronectin-binding integrins in cell motility	Regulatory processes	Cytoskeleton remodeling	0	Yi Hong	Esther Graudens
Cytoskeleton remodeling_Integrin outside-in signaling	Regulatory processes	Cytoskeleton remodeling	0	Jacob Sabates-Bellver	Yi Hong	Galamb1	Esther Graudens
Cytoskeleton remodeling_Keratin filaments	Regulatory processes	Cytoskeleton remodeling	14	Galamb1	Esther Graudens
Cytoskeleton remodeling_Neurofilaments	Regulatory processes	Neurophysiological process	185	Yi Hong	Galamb1	Esther Graudens
Cytoskeleton remodeling_RalA regulation pathway	Protein function	Cytoskeleton remodeling	9	Galamb2
Cytoskeleton remodeling_Regulation of actin cytoskeleton by Rho GTPases	Protein function	Cytoskeleton remodeling	6	Yi Hong
Cytoskeleton remodeling_Reverse signaling by ephrin B	Regulatory processes	Neurogenesis	0	Galamb1	Esther Graudens
Cytoskeleton remodeling_Role of Activin A in cytoskeleton remodeling	Protein function	Cytoskeleton remodeling	0	Yi Hong
Cytoskeleton remodeling_TGF, WNT and cytoskeletal remodeling	Diseases	Cytoskeleton remodeling	0	Jacob Sabates-Bellver	Yi Hong	Esther Graudens
dCTP/dUTP metabolism	Metabolic maps	Nucleotide metabolism	0	Jacob Sabates-Bellver
Development_A2B receptor: action via G-protein alpha s	Protein function	Development	0	Galamb1
Development_A3 receptor signaling	Protein function	Development	815	Esther Graudens
Development_Activation of astroglial cells proliferation by ACM3	Protein function	Neurogenesis	1	Galamb1
Development_Alpha-2 adrenergic receptor activation of ERK	Protein function	Development	0	Galamb1
Development_Angiopoietin - Tie2 signaling	Diseases	Development	0	Yi Hong
Development_Angiotensin activation of Akt	Disease	Development	160	Jacob Sabates-Bellver	Galamb1
Development_Beta-adrenergic receptors regulation of ERK	Disease	Development	0	Galamb1
Development_Beta-adrenergic receptors transactivation of EGFR	Protein function	Development	0	Galamb1
Development_CNTF receptor signaling	Protein function	Development	815	Yi Hong
Development_Dopamine D2 receptor transactivation of EGFR	Protein function	Development	0	Galamb1
Development_EDG1 signaling pathway	Protein function	Development	1747	Galamb1
Development_EDG3 signaling pathway	Protein function	Development	1747	Galamb1
Development_EDG5 and EDG3 in cell proliferation and differentiation	Protein function	Development	0	Yi Hong
Development_EDNRB signaling	Disease	Development	2379	Galamb1
Development_EGFR signaling pathway	Protein function	Development	1747	Yi Hong	Esther Graudens
Development_EGFR signaling via small GTPases	Protein function	Development	17	Esther Graudens
Development_Endothelin-1/EDNRA signaling	Disease maps	Development	0	Galamb1
Development_Endothelin-1/EDNRA transactivation of EGFR	Protein function	Development	0	Galamb1
Development_EPO-induced Jak-STAT pathway	Diseases	Development	3	Esther Graudens
Development_EPO-induced MAPK pathway	Diseases	Development	23	Esther Graudens
Development_EPO-induced PI3K/AKT pathway and Ca(2+) influx	Protein function	Development	0	Galamb1	Esther Graudens
Development_FGFR signaling pathway	Diseases	Development	1747	Esther Graudens
Development_Flt3 signaling	Protein function	Development	2379	Esther Graudens
Development_GDNF family signaling	Diseases	Development	301	Yi Hong
Development_Glucocorticoid receptor signaling	Protein function	Development	815	Esther Graudens
Development_GM-CSF signaling	Protein function	Development	1	Galamb1	Esther Graudens
Development_Growth hormone signaling via STATs and PLC/IP3	Diseases	Development	0	Yi Hong
Development_HGF signaling pathway	Protein function	Development	1747	Esther Graudens
Development_IGF-1 receptor signaling	Protein function	Development	447	Galamb1	Esther Graudens
Development_MAG-dependent inhibition of neurite outgrowth	Diseases	Development	3	Yi Hong
Development_Membrane-bound ESR1: interaction with growth factors signaling	Diseases	Development	0	Galamb1
Development_Mu-type opioid receptor signaling	Protein function	Development	1	Galamb1
Development_Mu-type opioid receptor signaling via Beta-arrestin	Protein function	Development	0	Galamb2
Development_Osteopontin signaling in osteoclasts	Protein function	Development	1	Esther Graudens
Development_PDGF signaling via STATs and NF-kB	Protein function	Development	0	Yi Hong	Galamb1	Esther Graudens
Development_PIP3 signaling in cardiac myocytes	Diseases	Development	0	Yi Hong	Galamb1	Esther Graudens
Development_Prolactin receptor signaling	Diseases	Development	815	Esther Graudens
Development_Role of CDK5 in neuronal development	Protein function	Development	0	Yi Hong	Galamb1	Esther Graudens
Development_Role of HDAC and calcium/calmodulin-dependent kinase (CaMK) in control of skeletal myogenesis	Protein function	Development	0	Yi Hong	Esther Graudens
Development_Role of IL-8 in angiogenesis	Protein function	Development	0	Jacob Sabates-Bellver	Yi Hong	Esther Graudens
Development_Signaling of Beta-adrenergic receptors via Beta-arrestins	Protein function	Development	0	Galamb2
Development_Slit-Robo signaling	Diseases	Development	6	Yi Hong	Galamb1	Esther Graudens
Development_Thrombopoetin signaling via JAK-STAT pathway	Regulatory processes	Development	1	Esther Graudens
Development_Thrombopoietin-regulated cell processes	Protein function	Development	73	Yi Hong	Esther Graudens
Development_Thrombospondin-1 signaling	Regulatory processes	Development	1229	Esther Graudens
Development_Transactivation of PDGFR in non-neuronal cells by Dopamine D2 receptor	Protein function	Development	0	Galamb1
Development_Transcription regulation of granulocyte development	Diseases	Development	0	Yi Hong
Development_VEGF-family signaling	Protein function	Development	301	Yi Hong	Galamb1
Development_WNT signaling pathway. Part 1. Degradation of beta-catenin in the absence WNT signaling	Diseases	Development	1	Jacob Sabates-Bellver	Yi Hong	Esther Graudens
Development_WNT signaling pathway. Part 2	Diseases	Development	43	Esther Graudens
dGTP metabolism	Metabolic maps	Nucleotide metabolism	4	Galamb1
DNA damage_ATM / ATR regulation of G2 / M checkpoint	Diseases	DNA-damage	0	Jacob Sabates-Bellver
DNA damage_ATM/ATR regulation of G1/S checkpoint	Diseases	DNA-damage	0	Jacob Sabates-Bellver	Esther Graudens
DNA damage_Brca1 as a transcription regulator	Diseases	DNA-damage	38	Esther Graudens
DNA damage_NHEJ mechanisms of DSBs repair	Regulatory processes	DNA-damage	1	Jacob Sabates-Bellver
DNA damage_Nucleotide excision repair	Regulatory processes	DNA-damage	2359	Jacob Sabates-Bellver	Esther Graudens
DNA damage_Role of Brca1 and Brca2 in DNA repair	Regulatory processes	DNA-damage	22	Jacob Sabates-Bellver
DNA damage_Role of SUMO in p53 regulation	Regulatory processes	DNA-damage	0	Galamb1	Esther Graudens
Estradiol metabolism	Metabolic maps	Steroid metabolism	55	Galamb1
Estradiol metabolism / Human version	Metabolic maps	Steroid metabolism	55	Galamb1
Estradiol metabolism / Rodent version	Metabolic maps	Steroid metabolism	55	Galamb1
Fatty Acid Omega Oxidation	Metabolic maps	Lipid metabolism	0	Galamb2
Folic acid metabolism	Metabolic maps	Vitamin and cofactor metabolism	0	Esther Graudens
Fructose metabolism	Metabolic maps	Carbohydrates metabolism	594	Esther Graudens
Fructose metabolism/ Rodent version	Metabolic maps	Carbohydrates metabolism	594	Esther Graudens
Glycine, serine, cysteine and threonine metabolism	Metabolic maps	Aminoacid metabolism	1	Esther Graudens
Glycine, serine, cysteine and threonine metabolism/ Rodent version	Metabolic maps	Aminoacid metabolism	1	Esther Graudens
Glycolysis and gluconeogenesis (short map)	Diseases	Carbohydrates metabolism	2	Esther Graudens
Glycolysis and gluconeogenesis p.3	Metabolic maps	Carbohydrates metabolism	0	Esther Graudens
Glycolysis and gluconeogenesis p.3 / Human version	Metabolic maps	Carbohydrates metabolism	0	Esther Graudens
G-protein signaling_RAC1 in cellular process	Protein function	Cytoskeleton remodeling	204	Esther Graudens
G-protein signaling_Ras family GTPases in kinase cascades (scheme)	Protein function	RAS-group	1	Esther Graudens
G-protein signaling_Regulation of CDC42 activity	Protein function	RAS-group	0	Esther Graudens
G-protein signaling_Regulation of RAC1 activity	Protein function	RAS-group	0	Esther Graudens
G-protein signaling_RhoA regulation pathway	Protein function	Cytoskeleton remodeling	56	Esther Graudens
GTP-XTP metabolism	Metabolic maps	Nucleotide metabolism	0	Jacob Sabates-Bellver	Esther Graudens
Heme metabolism	Diseases	Vitamin and cofactor metabolism	22	Jacob Sabates-Bellver	Esther Graudens
HETE and HPETE biosynthesis and metabolism	Metabolic maps	Lipid metabolism	0	Galamb1
Immune response _Immunological synapse formation	Regulatory processes	Immune response	0	Yi Hong	Esther Graudens
Immune response_Alternative complement pathway	Diseases	Immune response	0	Galamb1
Immune response_Antigen presentation by MHC class I	Disease	Immune response	0	Jacob Sabates-Bellver	Esther Graudens
Immune response_BCR pathway	Regulatory processes	Immune response	53	Galamb1
Immune response_CD40 signaling	Protein function	Immune response	79	Esther Graudens
Immune response_Classical complement pathway	Diseases	Immune response	2	Galamb1	Galamb2	Esther Graudens
Immune response_ETV3 affect on CSF1-promoted macrophage differentiation	Protein function	Immune response	0	Yi Hong	Esther Graudens
Immune response_Fc gamma R-mediated phagocytosis in macrophages	Regulatory processes	Immune response	0	Esther Graudens
Immune response_Function of MEF2 in T lymphocytes	Protein function	Immune response	0	Yi Hong
Immune response_Histamine H1 receptor signaling in immune response	Protein function	Immune response	0	Jacob Sabates-Bellver
Immune response_Histamine signaling in dendritic cells	Protein function	Immune response	2	Galamb2
Immune response_Human NKG2D signaling	Regulatory processes	Immune response	0	Yi Hong	Galamb1
Immune response_IFN gamma signaling pathway	Protein function	Immune response	8	Yi Hong	Esther Graudens
Immune response_IL-10 signaling pathway	Diseases	Immune response	0	Yi Hong	Esther Graudens
Immune response_IL-15 signaling	Protein function	Immune response	0	Esther Graudens
Immune response_IL-15 signaling via JAK-STAT cascade	Protein function	Immune response	0	Yi Hong	Esther Graudens
Immune response_IL-17 signaling pathways	Diseases	Immune response	0	Jacob Sabates-Bellver
Immune response_IL-2 activation and signaling pathway	Protein function	Immune response	0	Yi Hong	Esther Graudens
Immune response_IL-22 signaling pathway	Protein function	Immune response	0	Yi Hong	Esther Graudens
Immune response_IL-27 signaling pathway	Protein function	Immune response	0	Esther Graudens
Immune response_IL-4 - antiapoptotic action	Diseases	Immune response	0	Galamb1
Immune response_IL-6 signaling pathway	Protein function	Immune response	0	Yi Hong	Esther Graudens
Immune response_Inhibitory action of Lipoxins on pro-inflammatory TNF-alpha signaling	Regulatory processes	Immune response	0	Esther Graudens
Immune response_Lectin induced complement pathway	Diseases	Immune response	0	Galamb2	Esther Graudens
Immune response_MIF-JAB1 signaling	Regulatory processes	Immune response	0	Esther Graudens
Immune response_MIF-mediated glucocorticoid regulation	Regulatory processes	Immune response	0	Galamb2
Immune response_Murine NKG2D signaling	Regulatory processes	Immune response	2	Yi Hong	Galamb1
Immune response_Oncostatin M signaling via JAK-Stat in human cells	Protein function	Immune response	0	Jacob Sabates-Bellver	Yi Hong	Esther Graudens
Immune response_Oncostatin M signaling via JAK-Stat in mouse cells	Protein function	Immune response	0	Yi Hong	Esther Graudens
Immune response_Oncostatin M signaling via MAPK in human cells	Protein function	Immune response	0	Jacob Sabates-Bellver	Yi Hong	Esther Graudens
Immune response_Oncostatin M signaling via MAPK in mouse cells	Protein function	Immune response	0	Jacob Sabates-Bellver	Yi Hong	Esther Graudens
Immune response_PGE2 common pathways	Regulatory processes	Immune response	6	Galamb2
Immune response_PGE2 in immune and neuroendocrine system interactions	Regulatory processes	Immune response	1	Galamb2
Immune response_PGE2 signaling in immune response	Regulatory processes	Immune response	30	Galamb2
Immune response_Regulation of T cell function by CTLA-4	Regulatory processes	Immune response	0	Galamb1
Immune response_Role of DAP12 receptors in NK cells	Regulatory processes	Immune response	0	Galamb1	Esther Graudens
Immune response_TLR signaling pathways	Regulatory processes	Immune response	21	Jacob Sabates-Bellver
Immune response_TREM1 signaling pathway	Regulatory processes	Immune response	53	Galamb2
IMP biosynthesis	Metabolic maps	Nucleotide metabolism	8	Esther Graudens
Inhibitory action of Lipoxins on neutrophil migration	Diseases	Lung Diseases	0	Esther Graudens
Leucune, isoleucine and valine metabolism	Metabolic maps	Aminoacid metabolism	6	Esther Graudens
Leucune, isoleucine and valine metabolism.p.2	Metabolic maps	Aminoacid metabolism	6	Galamb1
Leucune, isoleucine and valine metabolism/ Rodent version	Metabolic maps	Aminoacid metabolism	9	Galamb1
Lysine metabolism	Metabolic maps	Aminoacid metabolism	50	Esther Graudens
Lysine metabolism/ Rodent version	Metabolic maps	Aminoacid metabolism	50	Esther Graudens
Mechanisms of CFTR activation by S-nitrosoglutathione (normal and CF)	Disease maps	Lung Diseases	0	Esther Graudens
Membrane-bound ESR1: interaction with G-proteins signaling	Diseases	Development	0	Galamb2
Muscle contraction_ GPCRs in the regulation of smooth muscle tone	Protein function	Muscle contraction	0	Yi Hong
Muscle contraction_EDG5-mediated smooth muscle contraction	Protein function	Muscle contraction	2	Yi Hong
Muscle contraction_Relaxin signaling pathway	Protein function	Development	18	Galamb2
n-3 Polyunsaturated fatty acid biosynthesis	Metabolic maps	Lipid metabolism	196	Galamb2
n-6 Polyunsaturated fatty acid biosynthesis	Metabolic maps	Lipid metabolism	0	Galamb2
Neurodisease_Parkin disorder under Parkinson disease	Diseases	Parkinson Disease	0	Galamb1	Esther Graudens
Neurophysiological process_Circadian rhythm	Regulatory processes	Neurophysiological process	0	Yi Hong
Neurophysiological process_EphB receptors in dendritic spine morphogenesis and synaptogenesis	Diseases	Neurophysiological process	0	Esther Graudens
Neurophysiological process_GABA-A receptor life cycle	Regulatory processes	Neurophysiological process	0	Esther Graudens
Neurophysiological process_Long-term depression in cerebellum	Regulatory processes	Neurophysiological process	0	Galamb2
Neurophysiological process_Netrin-1 in regulation of axon guidance	Protein function	Neurophysiological process	0	Esther Graudens
Neurophysiological process_PGE2-induced pain processing	Regulatory processes	Neurophysiological process	0	Galamb2
Neurophysiological process_Receptor-mediated axon growth repulsion	Diseases	Neurophysiological process	0	Yi Hong	Esther Graudens
NGF activation of NF-kB	Protein function	Neurogenesis	0	Esther Graudens
Nitrogen metabolism	Metabolic maps	Aminoacid metabolism	93	Galamb2
Nitrogen metabolism/ Rodent version	Metabolic maps	Aminoacid metabolism	93	Galamb2
Normal and pathological TGF-beta-mediated regulation of cell proliferation	Disease maps	Neoplasms and Neoplastic Processes	0	Esther Graudens
O-glycan biosynthesis	Metabolic maps	Carbohydrates metabolism	13	Jacob Sabates-Bellver
O-glycan biosynthesis / Human version	Metabolic maps	Carbohydrates metabolism	13	Jacob Sabates-Bellver
Oxidative phosphorylation	Metabolic maps	Energy metabolism	22	Esther Graudens
Oxidative stress_Role of ASK1 under oxidative stress	Protein function	Oxidative stress	0	Galamb2	Esther Graudens
Phenylalanine metabolism	Diseases	Aminoacid metabolism	48	Galamb2
Phenylalanine metabolism/ Rodent version	Metabolic maps	Aminoacid metabolism	48	Galamb2
Possible pathway of TGF-beta 1-dependent inhibition of CFTR expression	Disease maps	Lung Diseases	0	Esther Graudens
Propionate metabolism p.1	Metabolic maps	Carbohydrates metabolism	0	Galamb1
Prostaglandin 1 biosynthesis and metabolism	Metabolic maps	Lipid metabolism	327	Galamb2
Prostaglandin 2 biosynthesis and metabolism FM	Metabolic maps	Lipid metabolism	0	Galamb1
Proteolysis_Putative SUMO-1 pathway	Regulatory processes	Proteolysis	2	Galamb1	Galamb2
Proteolysis_Putative ubiquitin pathway	Regulatory processes	Proteolysis	47	Esther Graudens
Proteolysis_Role of Parkin in the Ubiquitin-Proteasomal Pathway	Diseases	Proteolysis	0	Galamb1	Esther Graudens
Pyruvate metabolism	Metabolic maps	Carbohydrates metabolism	42	Jacob Sabates-Bellver	Esther Graudens
Pyruvate metabolism/ Rodent version	Metabolic maps	Carbohydrates metabolism	42	Jacob Sabates-Bellver	Esther Graudens
Regulation of CFTR activity (norm and CF)	Diseases	Lung Diseases	2	Yi Hong	Galamb1	Esther Graudens
Regulation of degradation of deltaF508 CFTR in CF	Congenital, Hereditary, and Neonatal Diseases and Abnormalities Disease maps/Lung Diseases/Cystic Fibrosis		0	Yi Hong	Esther Graudens
Regulation of degradation of wt-CFTR	Diseases	Lung Diseases	0	Galamb1	Esther Graudens
Regulation of lipid metabolism_G-alpha(q) regulation of lipid metabolism	Regulation of metabolism	Regulation of lipid metabolism	0	Galamb2
Regulation of lipid metabolism_Insulin regulation of fatty acid methabolism	Diseases	Regulation of lipid metabolism	0	Galamb1
Regulation of lipid metabolism_Insulin signaling:generic cascades	Protein function	Regulation of lipid metabolism	0	Galamb1
Regulation of lipid metabolism_Regulation of acetyl-CoA carboxylase 2 activity in muscle	Regulation of metabolism	Development	0	Galamb1
Regulation of lipid metabolism_Regulation of lipid metabolism via LXR, NF-Y and SREBP	Protein function	Regulation of lipid metabolism	0	Jacob Sabates-Bellver	Yi Hong
Selenoamino acid metabolism	Metabolic maps/Metabolic maps (common pathways)/Aminoacid metabolism		0	Esther Graudens
Serotonin - melatonin biosynthesis and metabolism	Diseases	Metabolism of mediators	3	Yi Hong	Galamb1
Signal transduction_AKT signaling	Protein function/Kinases		1423	Esther Graudens
Signal transduction_PTEN pathway	Diseases	Phosphatases	749	Galamb1	Esther Graudens
Transcription_Assembly of RNA Polymerase II preinitiation complex on TATA-less promoters	Regulatory processes	Transcription	0	Jacob Sabates-Bellver	Galamb2	Esther Graudens
Transcription_ChREBP regulation pathway	Protein function	Transcription factors	684	Galamb2
Transcription_Ligand-dependent activation of the ESR1/SP pathway	Protein function	Transcription factors	0	Esther Graudens
Transcription_Ligand-Dependent Transcription of Retinoid-Target genes	Protein function	Transcription factors	0	Jacob Sabates-Bellver	Galamb2	Esther Graudens
Transcription_P53 signaling pathway	Protein function	Transcription factors	1749	Esther Graudens
Transcription_PPAR Pathway	Protein function	Transcription factors	2376	Galamb2
Transcription_Role of Akt in hypoxia induced HIF1 activation	Protein function	Hypoxia response	0	Esther Graudens
Transcription_Role of heterochromatin protein 1 (HP1) family in transcriptional silencing	Regulatory processes	Transcription	0	Yi Hong
Transcription_Transcription regulation of aminoacid metabolism	Diseases	Transcription factors Regulation of metabolism	0	Yi Hong
Translation _Regulation activity of EIF2	Regulatory processes	Translation	1	Galamb1	Galamb2	Esther Graudens
Translation _Regulation of translation initiation	Regulatory processes	Translation	2	Jacob Sabates-Bellver	Yi Hong	Esther Graudens
Translation_(L)-selenoaminoacids incorporation in proteins during translation	Regulatory processes	Translation	0	Jacob Sabates-Bellver	Yi Hong	Galamb1	Esther Graudens
Translation_Insulin regulation of translation	Diseases	Translation	751	Galamb1	Esther Graudens
Transport_Clathrin-coated vesicle cycle	Disease maps	Transport	0	Jacob Sabates-Bellver	Galamb1	Esther Graudens
Transport_Intracellular cholesterol transport in norm	Regulatory processes	Transport	0	Esther Graudens
Transport_Macropinocytosis	Regulatory processes	Transport	0	Galamb1	Esther Graudens
Transport_Macropinocytosis regulation by growth factors	Protein function	Transport	1021	Yi Hong	Esther Graudens
Transport_Rab-9 regulation pathway	Protein function	Transport	90	Esther Graudens
Transport_RAN regulation pathway	Protein function	Transport	684	Jacob Sabates-Bellver	Galamb1	Esther Graudens
TTP metabolism	Metabolic maps	Nucleotide metabolism	23	Galamb1
Unsaturated fatty acid biosynthesis	Metabolic maps	Lipid metabolism	402	Galamb2
Vitamin B3 (nicotinamide) metabolism	Metabolic maps	Vitamin and cofactor metabolism	4	Galamb2
Vitamin E (alfa-tocopherol) metabolism	Metabolic maps	Vitamin and cofactor metabolism	67	Galamb1	Galamb2
wtCFTR and delta508 traffic / Clathrin coated vesicles formation (norm and CF)	Diseases	Lung Diseases	0	Jacob Sabates-Bellver
wtCFTR and delta508-CFTR traffic / Generic schema (norm and CF)	Diseases	Lung Diseases	0	Galamb1
wtCFTR and deltaF508 traffic / Membrane expression (norm and CF)	Diseases	Lung Diseases	0	Yi Hong	Esther Graudens
