# Supplementary material for: Molecular Signature of Cancer at Gene Level or Pathway Level? Case Studies of Colorectal Cancer and Prostate Cancer Microarray Data
Source: Comput Math Methods Med. 2013 Jan 16;2013:909525. doi: 10.1155/2013/909525 (PMC3562646; doi:10.1155/2013/909525)
Supplement: Supplementary file 1 — Supplementary Table 1: The detailed information of the prostate cancer gene expression data sets used in the meta-analysis. Supplementary Table 2: The detailed list of the 262 GeneGO pathways that are enriched with DEGs (p-value < 0.05) Supplementary Table 3: The detailed list of the 111 GSEA gene sets that are enriched with DEGs (NOM p-value < 0.05 and FDR q-value < 0.05) [file 909525.f1.zip › Additional_file_3_CMMM_439520.xls]

## Sheet: Sheet1
NAME	SIZE	ES	NES	NOM p-val	FDR q-val
SCHUMACHER_MYC_UP	51	-0.700105	-1.89504	0	0.0274077
SANSOM_APC_LOSS5_UP	68	-0.611397	-1.89971	0	0.0277646
G1_TO_S_CELL_CYCLE_REACTOME	59	-0.636534	-1.90244	0	0.0278607
BASSO_REGULATORY_HUBS	124	-0.591348	-2.11346	0	0.0280189
TARTE_PLASMA_BLASTIC	282	-0.5719	-1.89566	0.00208333	0.0282675
IDX_TSA_UP_CLUSTER3	86	-0.720413	-1.9027	0.0060241	0.028887
ROTH_HTERT_DIFF	29	-0.611753	-1.87782	0	0.0291572
HSA04115_P53_SIGNALING_PATHWAY	60	-0.541993	-1.88698	0	0.0293352
CANCER_UNDIFFERENTIATED_META_UP	65	-0.765479	-1.87871	0	0.0295962
DNA_DAMAGE_SIGNALING	80	-0.576584	-1.90293	0	0.030048
MOREAUX_TACI_HI_VS_LOW_DN	151	-0.605768	-1.90578	0	0.0303912
OLDAGE_DN	43	-0.671013	-1.8788	0.00814664	0.0305003
XU_CBP_UP	19	-0.711149	-1.88156	0	0.0306383
CELL_CYCLE_KEGG	78	-0.651865	-1.91229	0	0.0309258
SHIPP_FL_VS_DLBCL_DN	34	-0.754434	-1.87144	0	0.031045
CELL_CYCLE_REGULATOR	20	-0.708445	-1.8675	0	0.0310768
HSA04110_CELL_CYCLE	103	-0.624119	-1.90759	0	0.0310917
HCC_SURVIVAL_GOOD_VS_POOR_DN	119	-0.611721	-1.86932	0	0.031139
MYC_TARGETS	39	-0.615351	-1.86187	0	0.0321678
CHANG_SERUM_RESPONSE_UP	131	-0.608103	-1.91274	0	0.0322384
LEE_TCELLS3_UP	85	-0.723792	-1.92715	0.00813008	0.0328319
HDACI_COLON_BUT12HRS_DN	66	-0.56315	-1.85659	0	0.0331165
CELL_CYCLE	72	-0.691917	-1.91433	0	0.0331469
PENG_RAPAMYCIN_DN	175	-0.575245	-1.85369	0.00409836	0.0335612
PENG_GLUTAMINE_DN	237	-0.604371	-1.9298	0	0.0340395
HG_PROGERIA_DN	23	-0.727548	-1.92029	0.00408998	0.0341108
PRMT5_KD_UP	169	-0.54432	-1.91623	0.00400802	0.0342084
ADIP_DIFF_CLUSTER5	36	-0.774958	-1.82794	0.00207469	0.0354752
HSA00790_FOLATE_BIOSYNTHESIS	34	-0.641022	-1.81435	0.00204499	0.0357799
CANCER_NEOPLASTIC_META_UP	56	-0.733866	-1.9304	0	0.0359325
BREASTCA_TWO_CLASSES	129	-0.491627	-1.8173	0	0.0359629
SHEPARD_CRASH_AND_BURN_MUT_VS_WT_DN	103	-0.530883	-1.82819	0.00816326	0.0360906
SERUM_FIBROBLAST_CORE_UP	168	-0.599733	-1.94124	0	0.0361246
CANTHARIDIN_DN	43	-0.657108	-1.81849	0	0.0361784
BRCA_PROGNOSIS_NEG	83	-0.582281	-1.82017	0.00416667	0.0362388
INOS_ALL_UP	48	-0.670021	-1.82967	0	0.0362479
CMV_IE86_UP	49	-0.763378	-1.81456	0.00410678	0.0363239
G2PATHWAY	21	-0.719368	-1.84407	0	0.0363457
CORDERO_KRAS_KD_VS_CONTROL_DN	40	-0.522101	-1.82069	0	0.0364949
PENG_LEUCINE_DN	139	-0.595754	-1.84205	0	0.0365266
SANA_IFNG_ENDOTHELIAL_DN	73	-0.581958	-1.83057	0.00215983	0.0366068
EGF_HDMEC_UP	38	-0.561983	-1.80788	0	0.0366539
MANALO_HYPOXIA_DN	77	-0.698024	-1.80928	0	0.0367338
HDACI_COLON_BUT_DN	215	-0.45723	-1.80619	0	0.0367698
TSA_CD4_UP	23	-0.574013	-1.83647	0	0.0368263
MRNA_PROCESSING_REACTOME	99	-0.555392	-1.81036	0	0.0370625
BRENTANI_REPAIR	34	-0.680784	-1.82096	0	0.0371017
HOFFMANN_BIVSBII_BI_TABLE2	168	-0.583659	-2.01382	0	0.0371075
SMITH_HCV_INDUCED_HCC_UP	32	-0.603402	-1.93366	0.00206186	0.0372082
P21_ANY_DN	30	-0.69247	-1.831	0.00622407	0.0373003
UVC_LOW_ALL_UP	18	-0.676786	-1.82152	0.00403226	0.037603
MOREAUX_TACI_HI_IN_PPC_UP	62	-0.682324	-1.83671	0	0.0376205
VERNELL_PRB_CLSTR1	62	-0.648587	-1.8317	0.0119284	0.0379037
HDACI_COLON_SUL16HRS_UP	40	-0.518915	-1.80138	0.00209644	0.0380486
HDACI_COLON_BUT24HRS_DN	92	-0.47757	-1.79852	0	0.038772
MYC_ONCOGENIC_SIGNATURE	159	-0.534087	-1.94756	0	0.0392213
LI_FETAL_VS_WT_KIDNEY_DN	136	-0.629429	-1.94137	0.00412371	0.0394087
REN_E2F1_TARGETS	34	-0.80425	-1.79514	0	0.0396315
HDACI_COLON_BUT48HRS_DN	100	-0.494223	-1.7929	0	0.0398338
HUMAN_TISSUE_TESTIS	31	-0.657629	-1.78762	0.00609756	0.0403372
BRENTANI_CELL_CYCLE	74	-0.626139	-1.95139	0	0.0403503
ADIP_VS_FIBRO_DN	24	-0.585671	-1.78898	0.00412371	0.040408
DNA_REPLICATION_REACTOME	42	-0.721261	-1.78973	0.00814664	0.0406776
BHATTACHARYA_ESC_UP	57	-0.709437	-2.02611	0	0.0417749
SHEPARD_GENES_COMMON_BW_CB_MO	47	-0.60355	-1.7784	0.0301811	0.0436744
SERUM_FIBROBLAST_CELLCYCLE	122	-0.755954	-1.95264	0	0.0446352
MRNA_SPLICING	47	-0.612782	-1.7748	0.00214592	0.0447413
BRCA1_OVEREXP_DN	100	-0.573364	-1.77005	0.00410678	0.0448032
ZHAN_MULTIPLE_MYELOMA_SUBCLASSES_DIFF	30	-0.638469	-1.77322	0.00808081	0.0448693
GOLDRATH_CELLCYCLE	26	-0.69878	-1.77135	0.0120724	0.0449507
HDACI_COLON_SUL24HRS_UP	59	-0.508912	-1.76429	0.00204918	0.0467175
HDACI_COLON_CURSUL_UP	36	-0.53683	-1.7609	0.00626305	0.0469423
HESS_HOXAANMEIS1_UP	55	-0.501437	-1.75793	0.0122699	0.0470269
YU_CMYC_UP	30	-0.708459	-1.76108	0.0177515	0.0474688
HESS_HOXAANMEIS1_DN	55	-0.501437	-1.75793	0.0122699	0.0476298
HSA00970_AMINOACYL_TRNA_BIOSYNTHESIS	37	-0.693244	-1.74261	0	0.0487159
HSC_EARLYPROGENITORS_FETAL	362	-0.441988	-1.73532	0	0.0487698
DRUG_RESISTANCE_AND_METABOLISM	82	-0.448062	-1.75131	0.00203666	0.049106
5FU_RESIST_GASTRIC_UP	20	-0.570735	-1.7429	0.00782779	0.0491299
ADIP_DIFF_CLUSTER4	32	-0.736152	-1.74402	0	0.0491818
HSC_EARLYPROGENITORS_SHARED	362	-0.441988	-1.73532	0	0.0492886
HDACI_COLON_CUR24HRS_UP	33	-0.609152	-1.73999	0.00604839	0.0492901
HSC_EARLYPROGENITORS_ADULT	364	-0.43975	-1.73679	0	0.0493325
BREAST_DUCTAL_CARCINOMA_GENES	19	-0.808375	-1.74477	0.0104384	0.0494233
PEART_HISTONE_DN	70	-0.527798	-1.74925	0.00625	0.0494696
ZHAN_MM_CD138_PR_VS_REST	35	-0.803884	-1.73766	0.0059761	0.0494837
P21_P53_ANY_DN	40	-0.765266	-1.74576	0.010352	0.0495756
ATMPATHWAY	19	-0.678718	-1.75161	0.00422833	0.0496224
TSADAC_HYPOMETH_OVCA_UP	23	-0.671071	-2.08289	0.0019685	0.0262529
CELL_CYCLE	49	-0.567474	-1.93267	0	0.0273126
CANCER_NEOPLASTIC_META_UP	48	-0.643676	-1.92305	0	0.0277398
P21_P53_ANY_DN	29	-0.72496	-1.93657	0.00385356	0.028441
LE_MYELIN_UP	42	-0.569857	-1.93768	0	0.0321939
MANALO_HYPOXIA_DN	53	-0.620016	-1.99543	0.00197239	0.0323674
HSA03010_RIBOSOME	42	-0.731655	-1.9779	0	0.0324073
HSA00790_FOLATE_BIOSYNTHESIS	20	-0.608705	-1.88873	0	0.0330752
MYC_ONCOGENIC_SIGNATURE	95	-0.52561	-2.01421	0	0.0337473
POMEROY_DESMOPLASIC_VS_CLASSIC_MD_DN	20	-0.586385	-1.89044	0	0.0351169
SANSOM_APC_LOSS4_UP	54	-0.555899	-1.87218	0	0.0357396
HIPPOCAMPUS_DEVELOPMENT_PRENATAL	23	-0.759319	-1.86704	0	0.0358824
SERUM_FIBROBLAST_CELLCYCLE	82	-0.600778	-1.89916	0.0120724	0.0362227
CELL_CYCLE_KEGG	51	-0.554928	-1.93882	0.0020202	0.036862
SANSOM_APC_LOSS5_UP	39	-0.60955	-1.89208	0	0.0372703
LI_FETAL_VS_WT_KIDNEY_DN	84	-0.551354	-1.87421	0.00972763	0.0375409
RIBOSOMAL_PROTEINS	56	-0.694605	-1.94763	0	0.0388085
MOREAUX_TACI_HI_VS_LOW_DN	87	-0.475058	-1.84213	0	0.0437533
IDX_TSA_UP_CLUSTER3	57	-0.622193	-1.84516	0.00596422	0.0447419
BHATTACHARYA_ESC_UP	37	-0.629674	-1.82559	0.00381679	0.0470194
PENG_GLUTAMINE_DN	161	-0.493073	-1.82797	0	0.0479149
OLDAGE_DN	28	-0.642155	-1.82942	0.00398406	0.0493646
HOFFMANN_BIVSBII_BI_TABLE2	110	-0.453035	-1.81711	0.0121457	0.0498743
